# Supplementary material for: Preparation of Sweet Potato Porous Starch by Marine Dextranase and Its Adsorption Characteristics
Source: MDPI journal article supplement (doi:10.3390/foods13040549), 2024-02-10
Supplement: s1 [file s1]

Table S1. Abbreviation and full name list.

| Reagent abbreviation | Full name                                    |
|----------------------|----------------------------------------------|
| PS                   | porous starch                                |
| OPCs                 | proanthocyanidins                            |
| CUR                  | curcumin                                     |
| IPTG                 | Isopropyl-beta-D-thiogalactopyranoside       |
| PBS                  | phosphate buffer saline                      |
| BCA                  | bicinchoninic acid assay                     |
| DNS                  | 3,5-Dinitrosalicylic acid                    |
| CUR-PS               | curcumin-sweet potato porous starch          |
| OPCs-PS              | Proanthocyanidins-sweet potato porous starch |

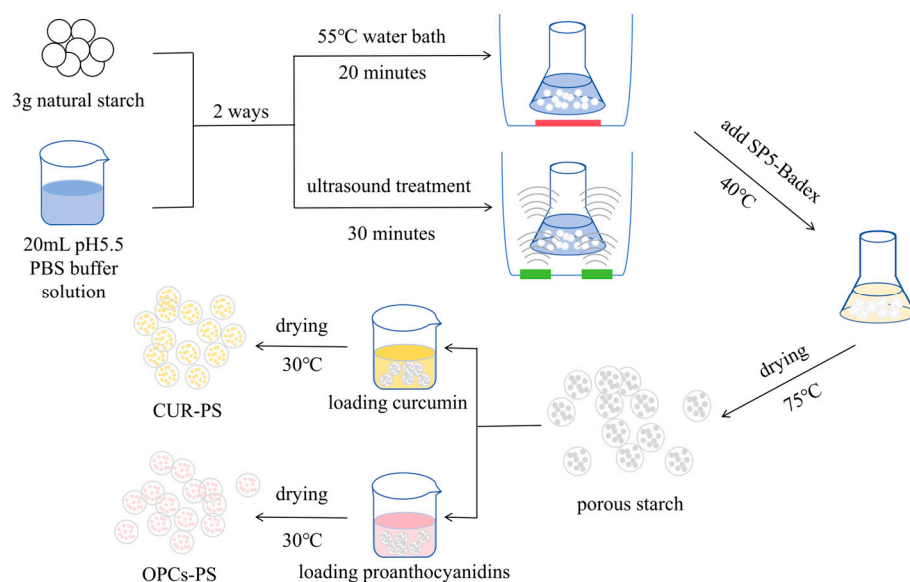

Figure S1. Flow chart of preparation of the porous starches.
